# Supplementary material for: A negative photoconductivity photodetector based on two-dimensional Nb3Cl8
Source: Royal Society of Chemistry journal article supplement (doi:10.1039/d4nr03376k), 2024-01-01
Supplement: d4nr03376k1.pdf [file d4nr03376k1.pdf]

## Supporting Information

# Negative Photoconductivity Photodetector based on two-dimensional Nb<sub>3</sub>Cl<sub>8</sub>

*Bom Lee<sup>a,†</sup>, Xiaojie Zhang<sup>a,†</sup>, Jinsu Kang<sup>a</sup>, Byung Joo Jeong<sup>a</sup>, Sooheon Cho<sup>a</sup>, Kyung Hwan choi<sup>b</sup>, Jiho Jeon<sup>b</sup>, Sang Hoon Lee<sup>a</sup>, Dahoon Kim<sup>a</sup>, Yeong Hyeop Kim<sup>a</sup>, Ji-Hee Kim<sup>c,\*</sup>, Hak Ki Yu<sup>d,\*</sup>, and Jae-Young Choi<sup>a,b,\*</sup>*

<sup>a</sup>School of Advanced Materials Science and Engineering, Sungkyunkwan University, Suwon 16419, Republic of Korea

<sup>b</sup>SKKU Advanced Institute of Nanotechnology (SAINT), Sungkyunkwan University, Suwon 16419, Republic of Korea

<sup>c</sup>Department of Physics, Pusan National University, Busan 46241, Republic of Korea.

<sup>d</sup>Department of Materials Science and Engineering & Department of Energy Systems Research, Ajou University, Suwon 16499, Republic of Korea.

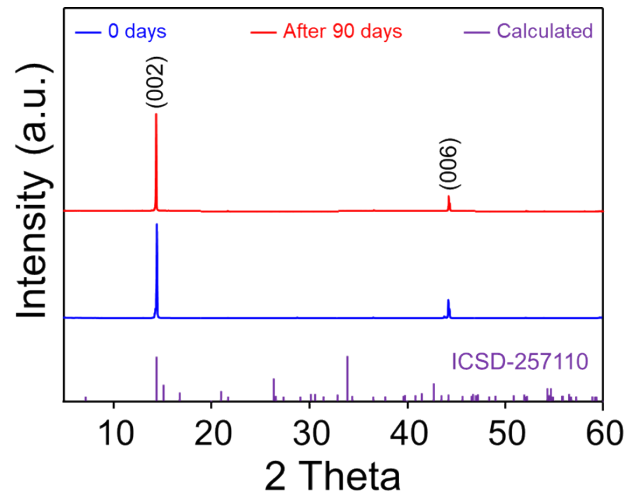

**Fig. S1.** Materials stability characteristic of Nb<sub>3</sub>Cl<sub>8</sub>

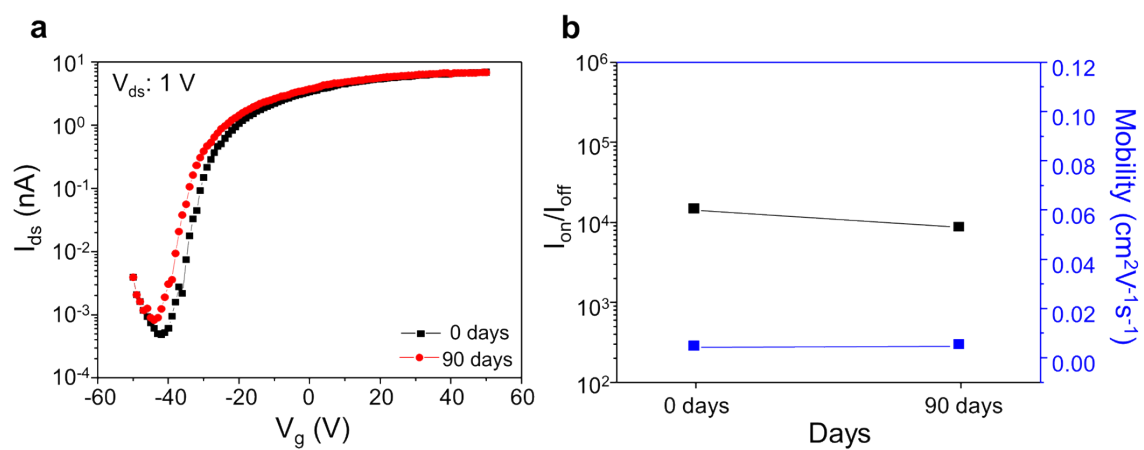

**Fig. S2.** Device stability characteristic of 8.72 nm thick Nb<sub>3</sub>Cl<sub>8</sub> FET

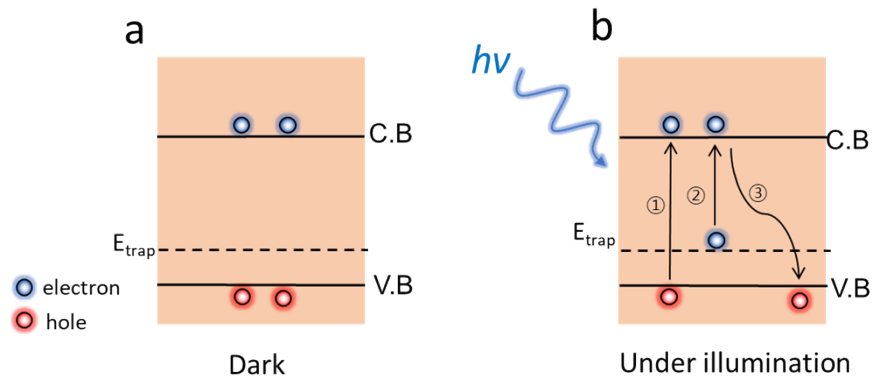

**Fig. S3.** Energy band diagram showing the photoresponse process within the  $\text{Nb}_3\text{Cl}_8$

In process ①, electrons in the valence band ( $E_v$ ) absorb photon energy and are excited to the conduction band ( $E_c$ ), generating electron-hole pairs and increasing the hole concentration. This represents the conventional photoexcitation mechanism. Concurrently, process ② involves the excitation of electrons from trap levels ( $E_{\text{trap}}$ ) within the bandgap to the conduction band. However, the key to the observed negative photoconductivity lies in process ③, where photo-induced electrons recombine with holes in the valence band through these trap states, effectively reducing the overall hole concentration. This recombination process, facilitated by the presence of trap levels, is the primary driver of the decrease in conductivity under illumination, leading to the NPC phenomenon in  $\text{Nb}_3\text{Cl}_8$ .

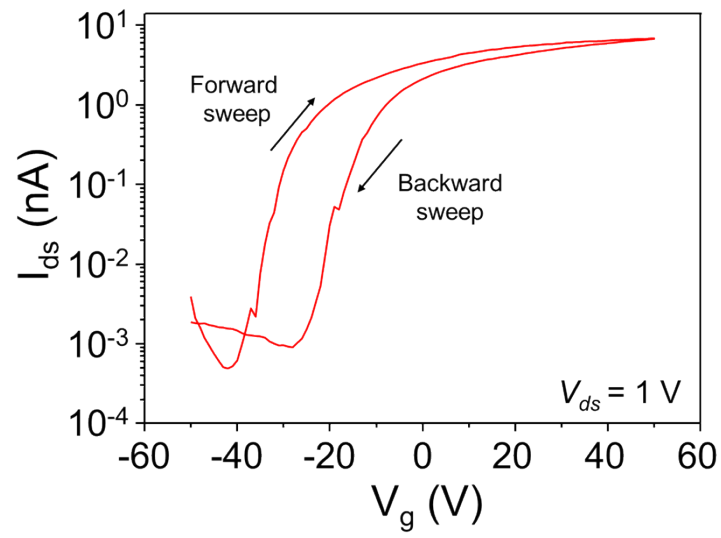

**Fig. S4.** Hysteresis loop in the transfer characteristics of  $Nb_3Cl_8$

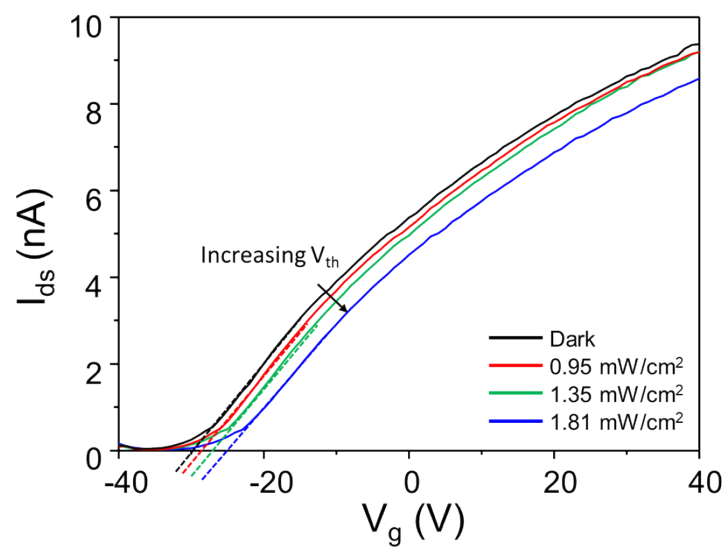

**Fig. S5.** Transfer characteristics ( $I_{ds}$ - $V_g$ ) of Nb<sub>3</sub>Cl<sub>8</sub> nanosheets, obtained by sweeping the gate voltage from  $-40$  to  $40$  V under dark and light at fixed  $V_{ds}$  of  $1$  V.

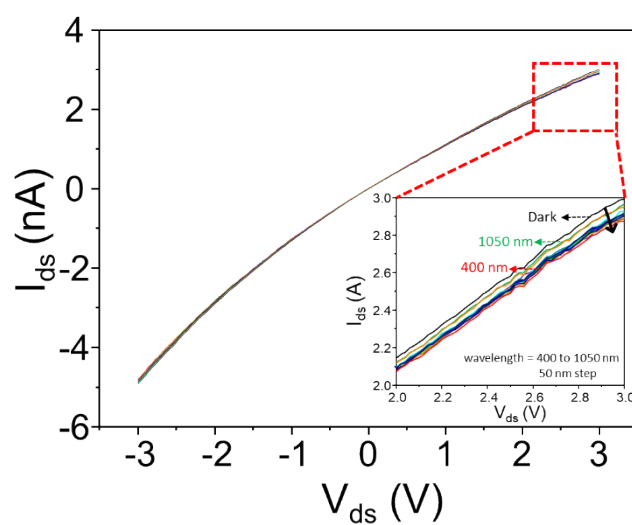

**Fig. S6.**  $I_{ds}$ - $V_{ds}$  curve of the  $Nb_3Cl_8$  in the dark mode and under light illumination with different wavelength from 400 to 1050 nm

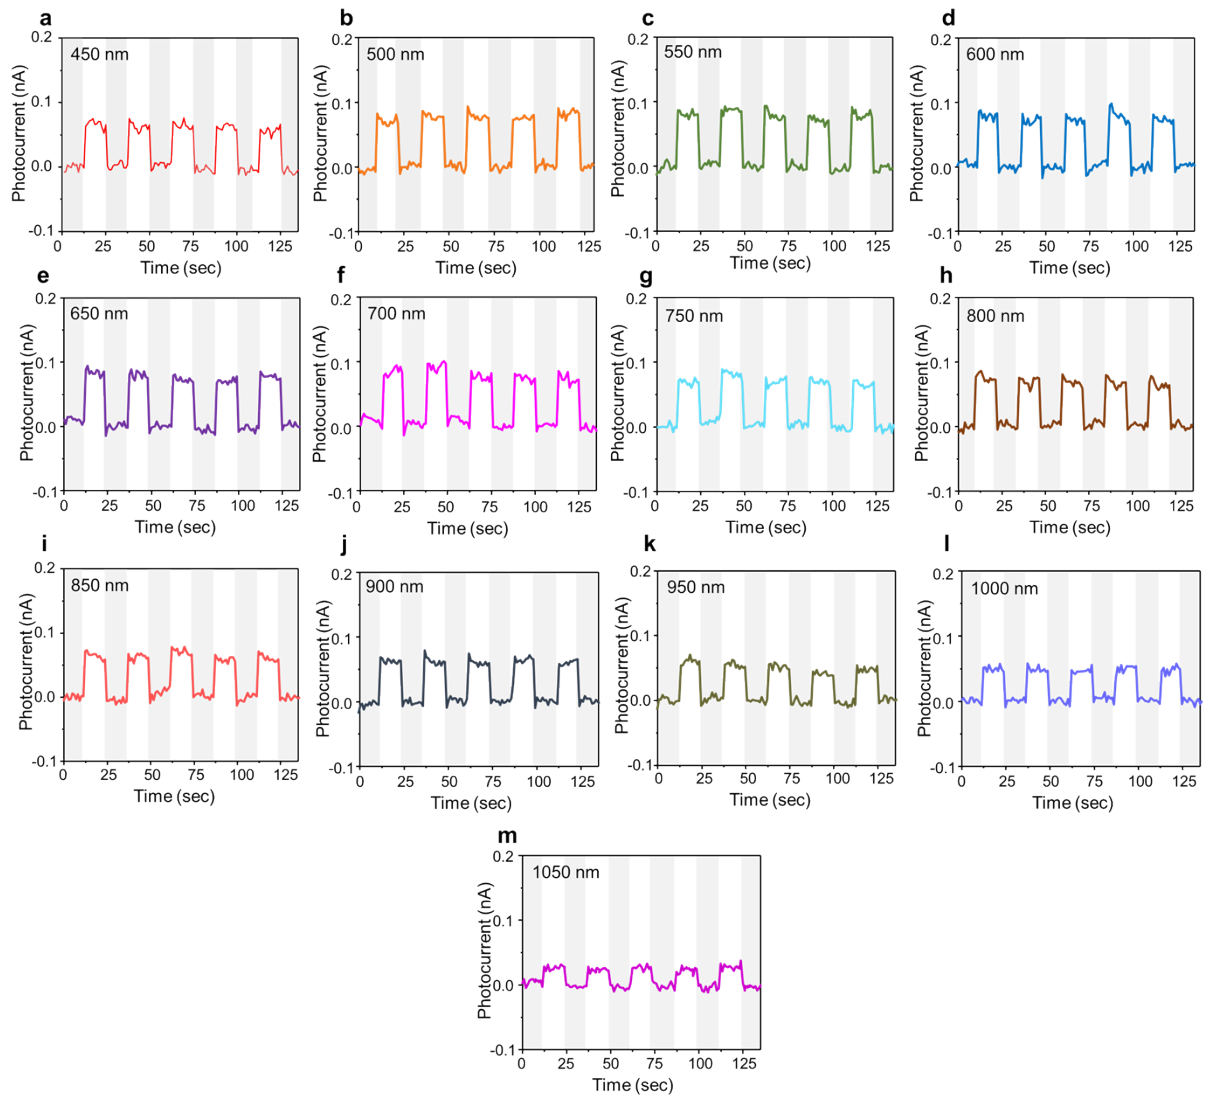

**Fig. S7.** Time-resolved photo response of the  $\text{Nb}_3\text{Cl}_8$  at  $V_{\text{ds}} = 3$  V under different wavelength ranges (450-1050 nm) with a power density of  $1.54$   $\text{mW}/\text{cm}^2$ .



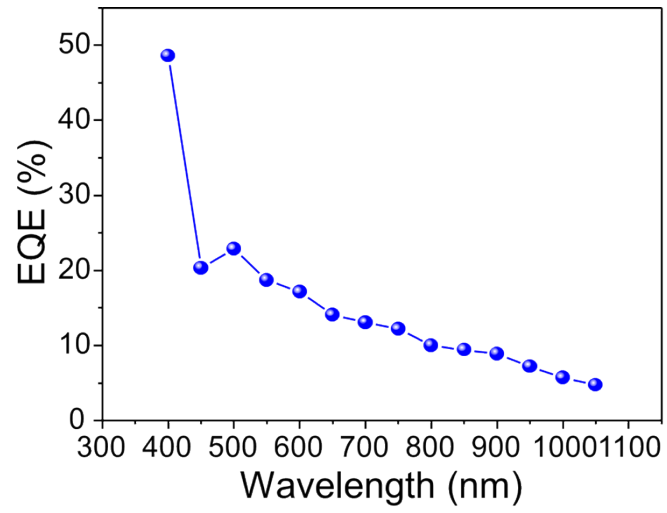

**Fig. S8.** Wavelength dependent EQE at  $V_{ds} = 3$  V and power density =  $1.54$  mW/cm<sup>2</sup>.

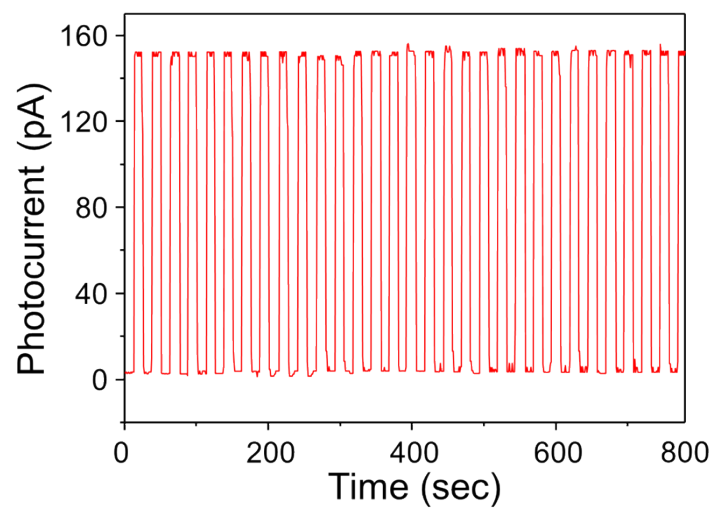

**Fig. S9.** Photocurrent stability characteristic of 8.72 nm thick  $\text{Nb}_3\text{Cl}_8$  FET

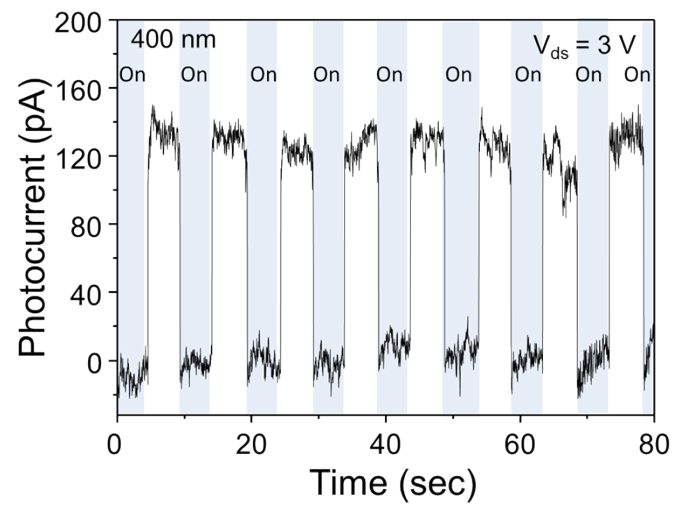

**Fig. S10.** Time-resolved photoresponse in vacuum condition at  $V_{ds} = 3$  V and power density = 1.54 mW/c

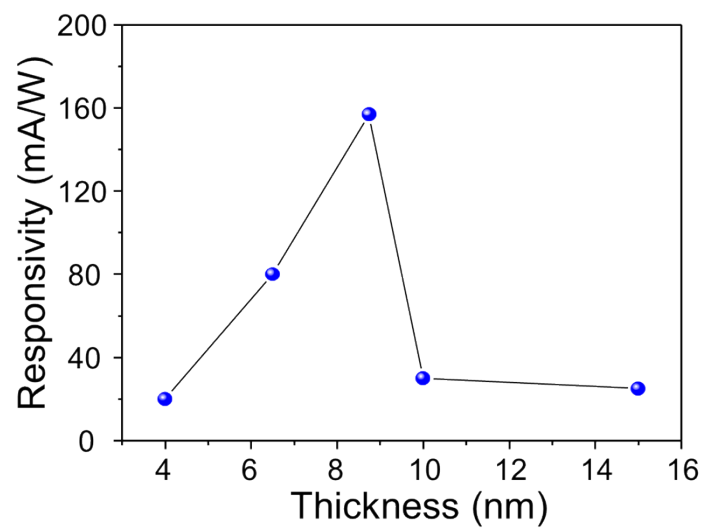

**Fig S11.** Thickness-dependent responsivity of Nb<sub>3</sub>Cl<sub>8</sub> nanoflakes.

**Table. S1.** Comparison table of key parameters of 2D NPC

| Material                            | Bias Voltage (V) | Wavelength (nm) | Source | Responsivity (mA/W) | Detectivity (Jones)       | Response Time rise/decay (ms/ms)        | Ref.      |
|-------------------------------------|------------------|-----------------|--------|---------------------|---------------------------|-----------------------------------------|-----------|
| MoTe <sub>2</sub> /hBN/graphene     | -                | 635             | light  | ~500                | $\sim 1.6 \times 10^{12}$ | ~3                                      | [1]       |
| WTe <sub>2</sub> /GaAs              | 0.6              | 1064            | laser  | 271                 | $9.18 \times 10^{11}$     | -                                       | [2]       |
| InAs                                | 0.1              | 700             | laser  | $1.231 \times 10^6$ | $5.46 \times 10^{10}$     | 150/50                                  | [3]       |
| MoS <sub>2</sub>                    | 2                | 650             | laser  | $8.44 \times 10^6$  | -                         | 500                                     | [4]       |
| WSe <sub>2</sub> /SnSe <sub>2</sub> | 2                | 532             | laser  | $2 \times 10^7$     | $2.15 \times 10^{12}$     | $1 \times 10^{-3}/5 \times 10^{-3}$     | [5]       |
| Graphene/InSe                       | 1                | 365             | light  | $1.88 \times 10^8$  | -                         | 22                                      | [6]       |
| WS <sub>2</sub> /RGO                | -                | 808             | laser  | $6 \times 10^3$     | -                         | $3.6 \times 10^4/5.4 \times 10^4$       | [7]       |
| PtTe <sub>2</sub>                   | -                | 808             | laser  | 600                 | $2.1 \times 10^8$         | 340/380                                 | [8]       |
| ReS <sub>2</sub> /PdSe <sub>2</sub> | -                | 638             | laser  | $5.32 \times 10^5$  | -                         | $7.9 \times 10^{-3}/8.7 \times 10^{-3}$ | [9]       |
| ReSe <sub>2</sub> /AZO              | 0.1              | 365             | laser  | 150                 | $2.4 \times 10^{10}$      | -                                       | [10]      |
| Nb <sub>3</sub> Cl <sub>8</sub>     | 3                | 400             | light  | 156.82              | $4.7 \times 10^9$         | 1.45 /1.40                              | this work |

## Reference

1. F. Liu, X. Lin, Y. Yan, X. Gan, Y. Cheng and X. Luo, *Nano Letters*, 2023, **23**, 11645–11654.
2. J. Wang, H. Wang, Q. Chen, L. Qi, Z. Zheng, N. Huo, W. Gao, X. Wang and J. Li, *Applied Physics Letters*.
3. X. Wang, D. Pan, M. Sun, F. Lyu, J. Zhao and Q. Chen, *ACS Applied Materials & Interfaces*, 2021, **13**, 26187–26195.
4. Y. Sun, Y. Wang, Z. Wang, L. Jiang, Z. Hou, L. Dai, J. Zhao, Y. Xie, L. Zhao and Z. Jiang, *Advanced Functional Materials*, 2024, 2402185.
5. S. Ghosh, A. Varghese, H. Jawa, Y. Yin, N. V Medhekar and S. Lodha, *ACS nano*, 2022, **16**, 4578–4587.
6. B. Cui, Y. Xing, K. Niu, J. Han, H. Ma, W. Lv, T. Lei, B. Wang and Z. Zeng, *Journal of Science: Advanced Materials and Devices*, 2022, **7**, 100484.
7. S. Ratha, A. J. Simbeck, D. J. Late, S. K. Nayak and C. S. Rout, *Applied Physics Letters*.
8. H. Zhang, L. Du, X. Zhong, W. Wu, Z. Fu, W. Sun, J. Liu, X. Song, J. Zhang and Z. Dai, *Sensors and Actuators A: Physical*, 2024, **371**, 115324.
9. P. Li, Y. Sun, X. Gao, Y. Meng, J. Ma, J. Wang, H. Gao, C. Du, W. Wang and K. Li, *Materials Today Communications*, 2024, **40**, 109945.
10. J. Guo, W. Lei, Y. Zhao, Z. Tan and W. Xie.
